# Supplementary material
Source: PubMed Central journal article supplement (PMC1061512)

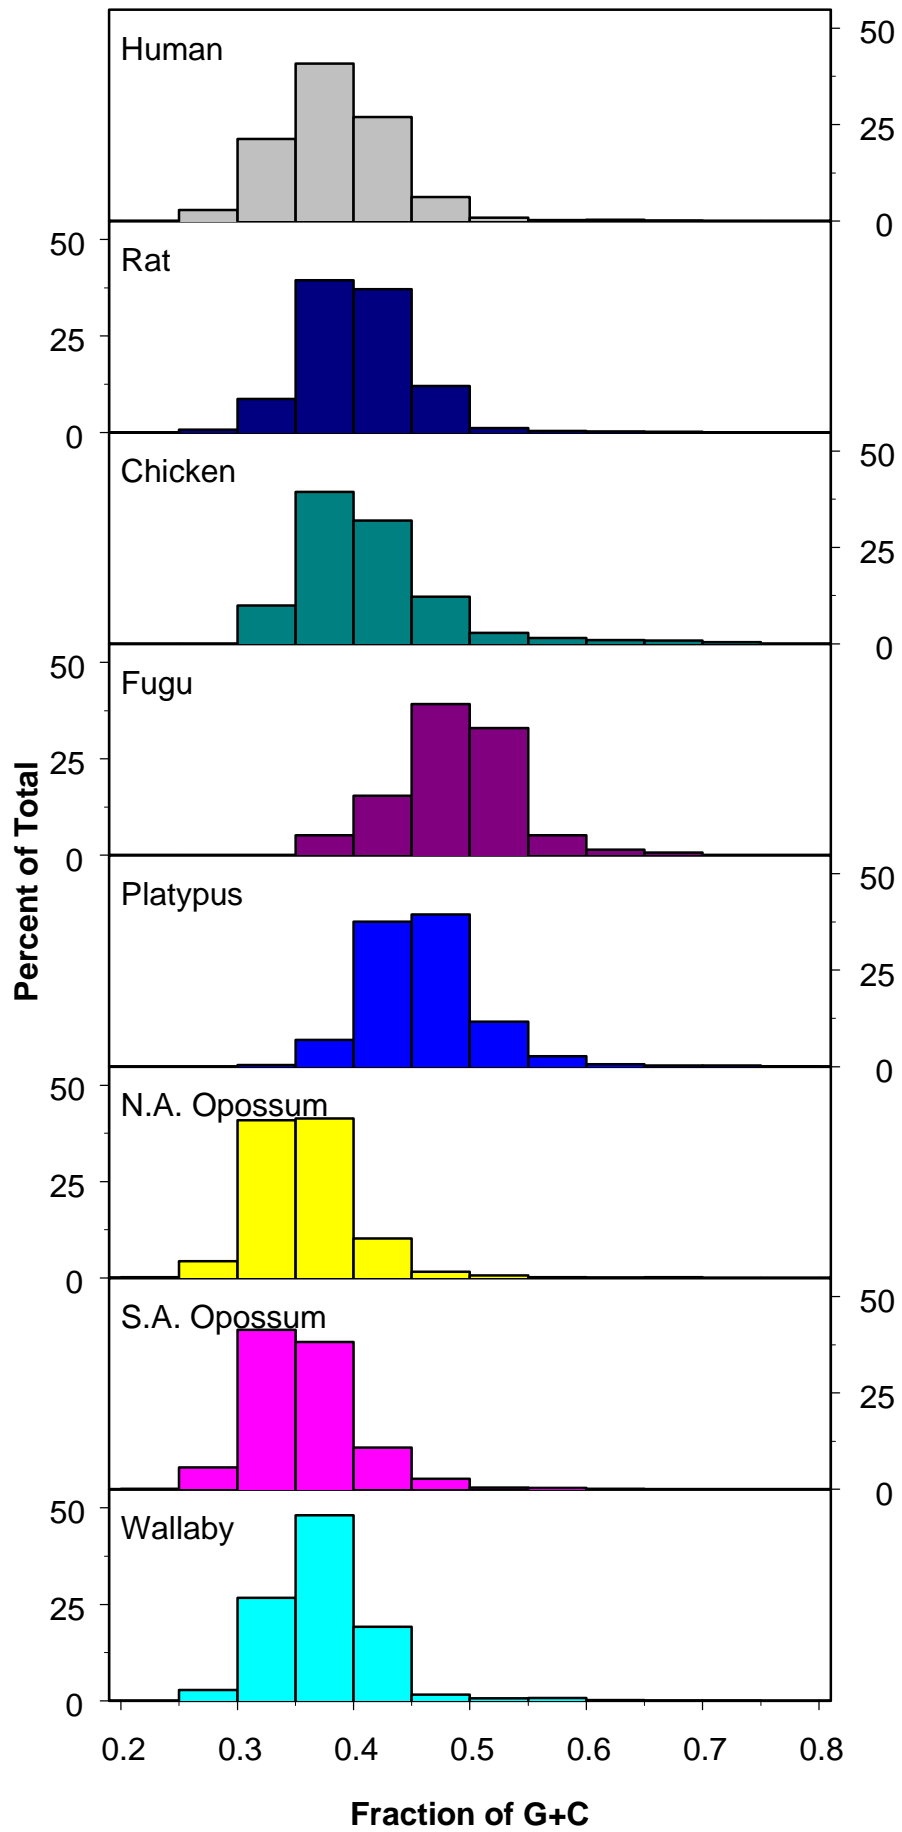

Supplement: pnas_102_9_3354__1.pdf [file pnas_102_9_3354__1.pdf]

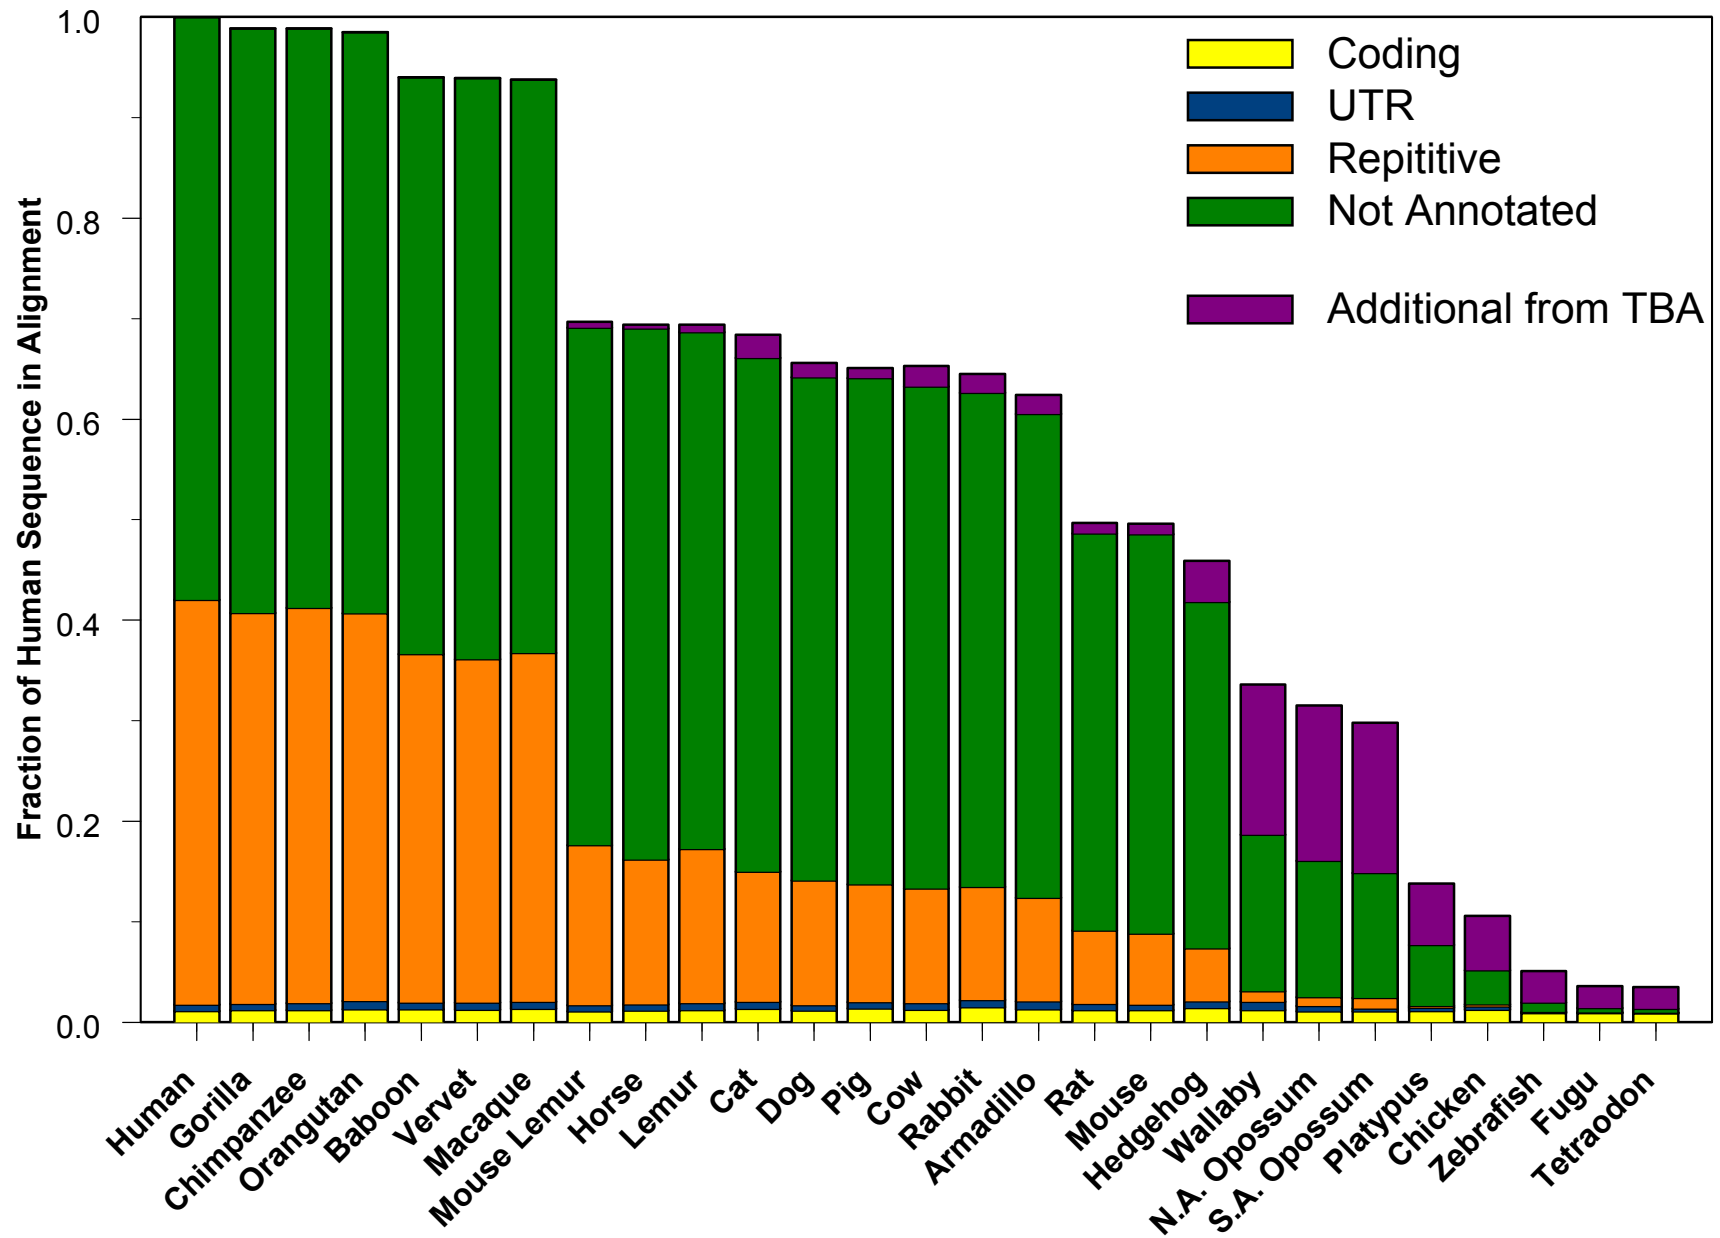

Supplement: pnas_102_9_3354__2.pdf [file pnas_102_9_3354__2.pdf]

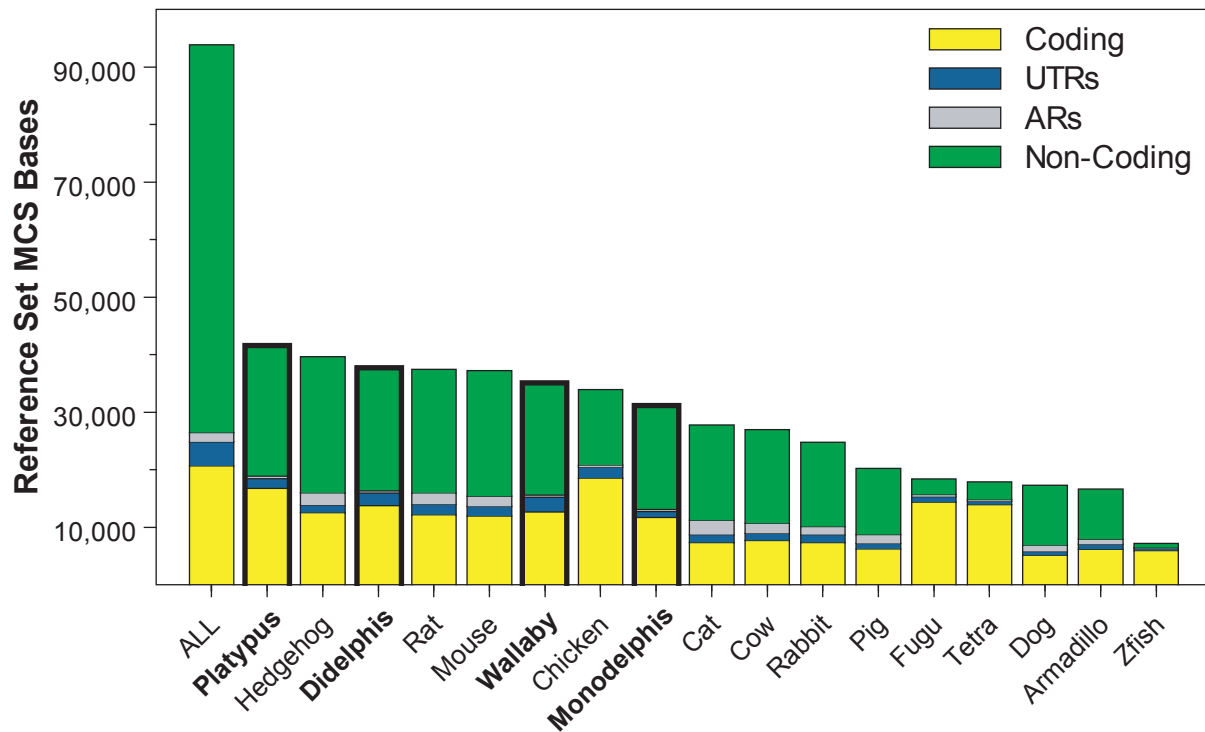

Supplement: pnas_102_9_3354__3.pdf [file pnas_102_9_3354__3.pdf]

TES      CAV2 & 1      MET      CAPZA2      ST7      WNT2      ASZ1      CFTR      CTTNBP2

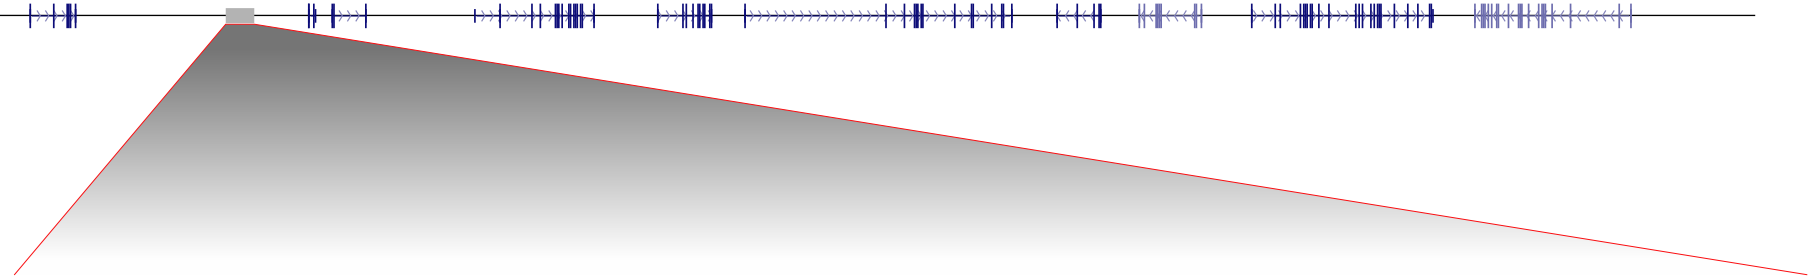

A      B      C      B      D      C      A

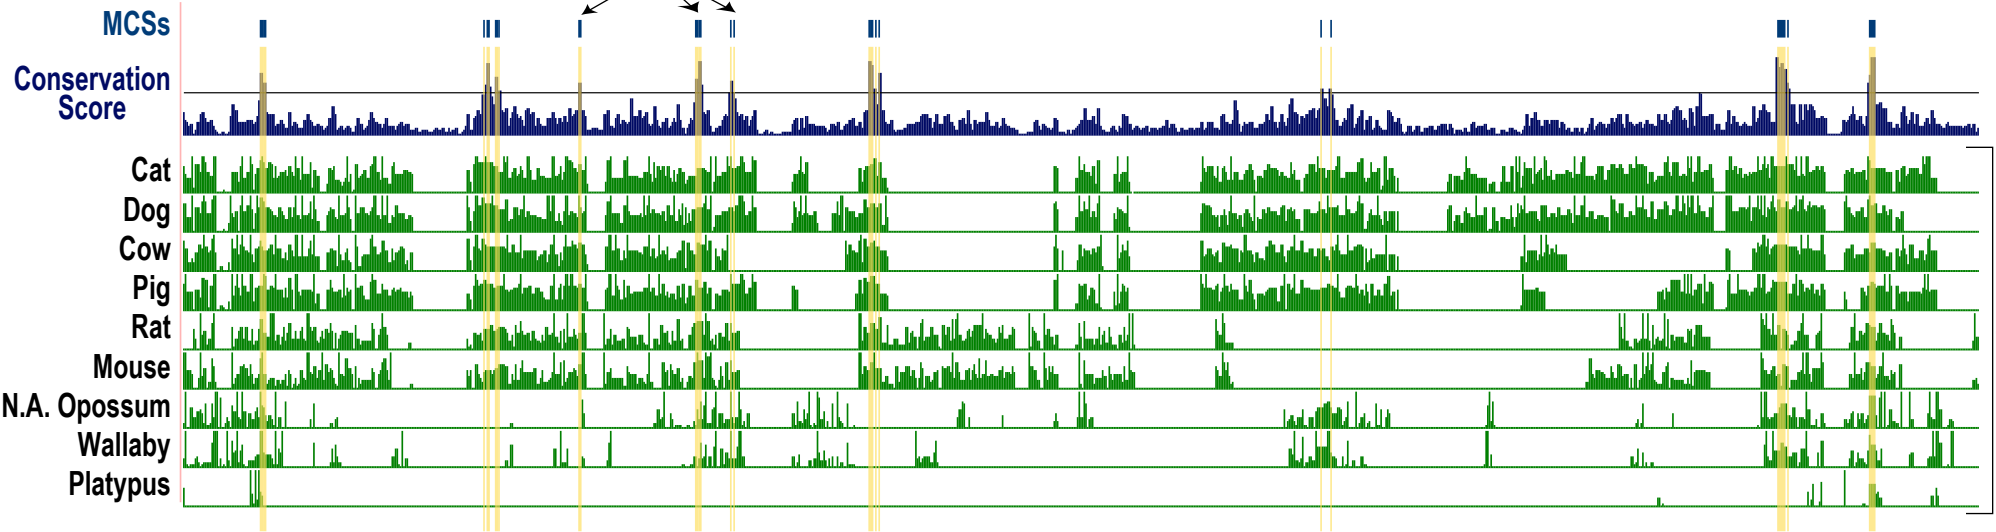

Supplement: pnas_102_9_3354__4.pdf [file pnas_102_9_3354__4.pdf]
